# Supplementary material
Source: PubMed Central journal article supplement (PMC1069711)
Supplement: plntcell_tpc.104.029603_1.pdf [file plntcell_tpc.104.029603_1.pdf]

**Different signaling and cell-death roles of heterotrimeric G protein  $\alpha$  and  $\beta$  subunits in the *Arabidopsis* oxidative stress response to ozone.**

Junghee H. Joo, Shiyu Wang, J. G. Chen, A. M. Jones and Nina V. Fedoroff  
Plant Cell 17:1-14 (2005)

**Supplemental Data**

**A.**

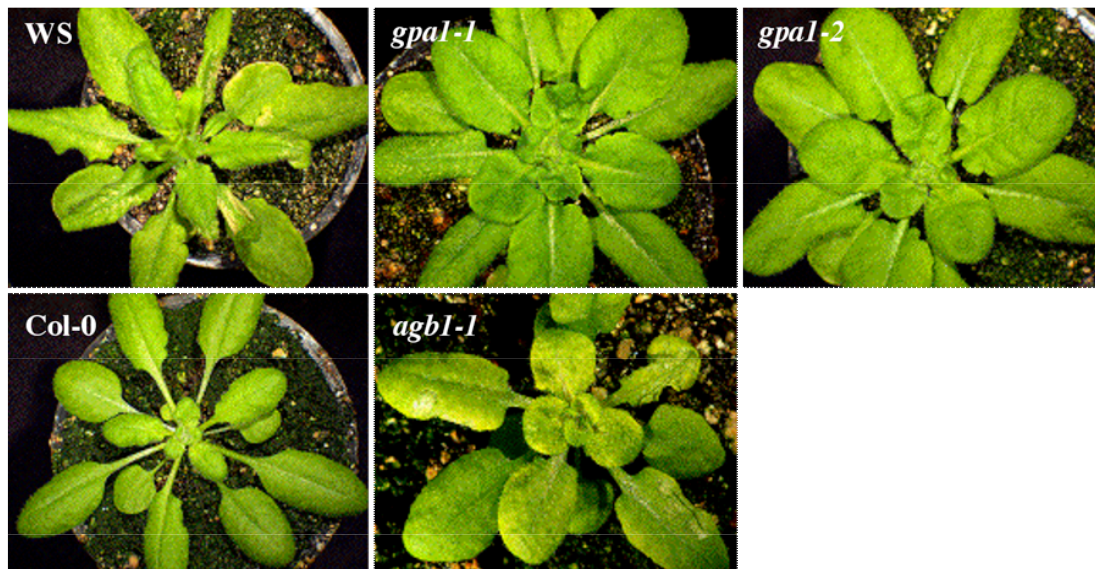

**B.**

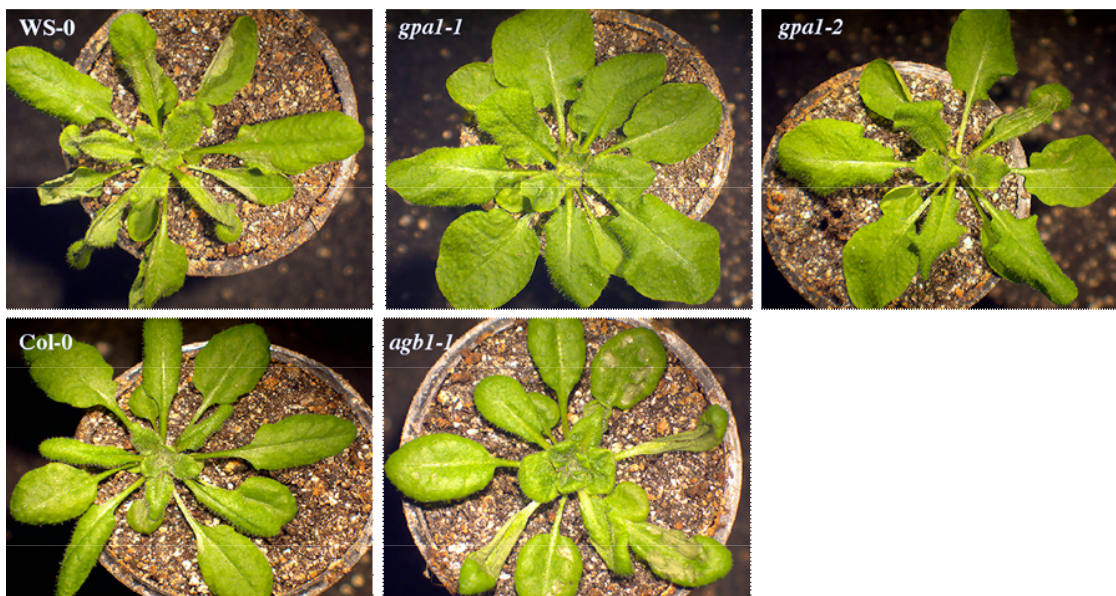

**Supplemental Figure 1. Ozone-induced lesions in wildtype plants of different ecotypes and different G protein mutant alleles.** A. Plants (4 weeks old) were exposed to 350 ppb ozone for 6 hrs and photographed 24 hrs after the onset of exposure. B. Plants (4 weeks old) were exposed to 500 ppb ozone for 3 hrs and photographed 24 hrs after the onset of exposure. The *gpa1-1* and *gpa1-2* mutants are in the ozone-sensitive WS background; the *agb1-1* mutant is in the Col-O background.
