# Supplementary material
Source: PubMed Central journal article supplement (PMC1069711)
Supplement: plntcell_tpc.104.029603_2.pdf [file plntcell_tpc.104.029603_2.pdf]

**Different signaling and cell-death roles of heterotrimeric G protein  $\alpha$  and  $\beta$  subunits in the *Arabidopsis* oxidative stress response to ozone.**

Junghee H. Joo, Shiyu Wang, J. G. Chen, A. M. Jones and Nina V. Fedoroff  
Plant Cell 17:1-14 (2005)

**Supplemental Data**

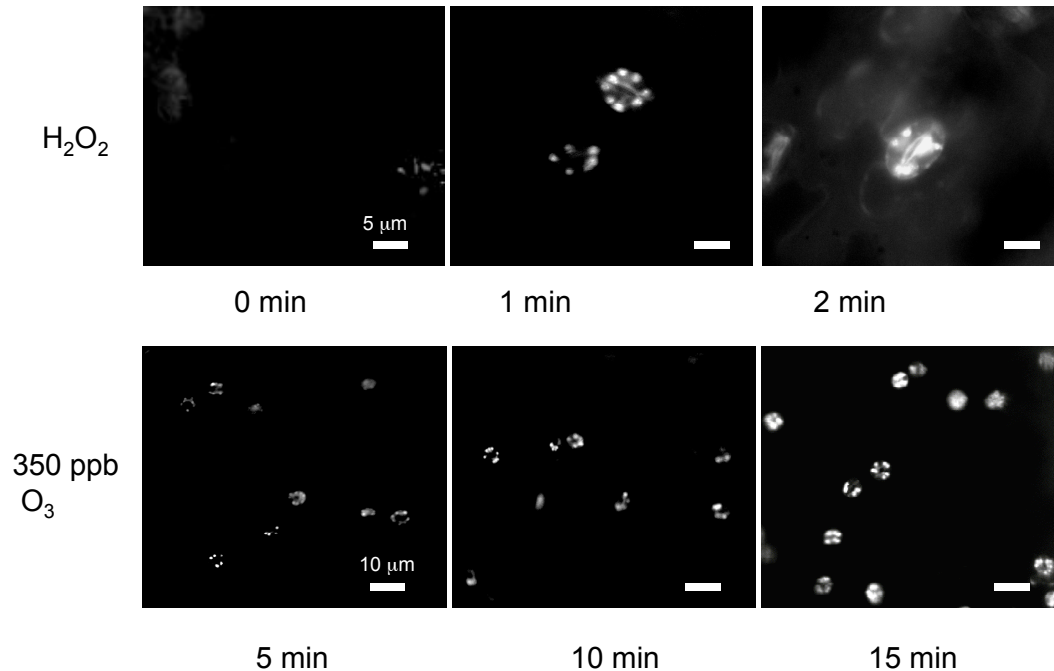

**Supplemental Fig. 2. Hydrogen peroxide and ozone induced-ROS.** Fluorescence microscopy imaging of ROS in epidermal tissue. Epidermal peels were loaded with  $H_2DCF-DA$ , washed, and examined by fluorescence microscopy after exposure to 350 ppb ozone; 10  $\mu M$   $H_2O_2$  was added directly to  $H_2DCF-DA$ -loaded epidermal peels immediately prior to examination.
