# Supplementary material
Source: PubMed Central journal article supplement (PMC1069711)
Supplement: plntcell_tpc.104.029603_3.pdf [file plntcell_tpc.104.029603_3.pdf]

**Different signaling and cell-death roles of heterotrimeric G protein  $\alpha$  and  $\beta$  subunits in the *Arabidopsis* oxidative stress response to ozone.**

Junghee H. Joo, Shiyu Wang, J. G. Chen, A. M. Jones and Nina V. Fedoroff  
Plant Cell 17:1-14 (2005)

**Supplemental Data**

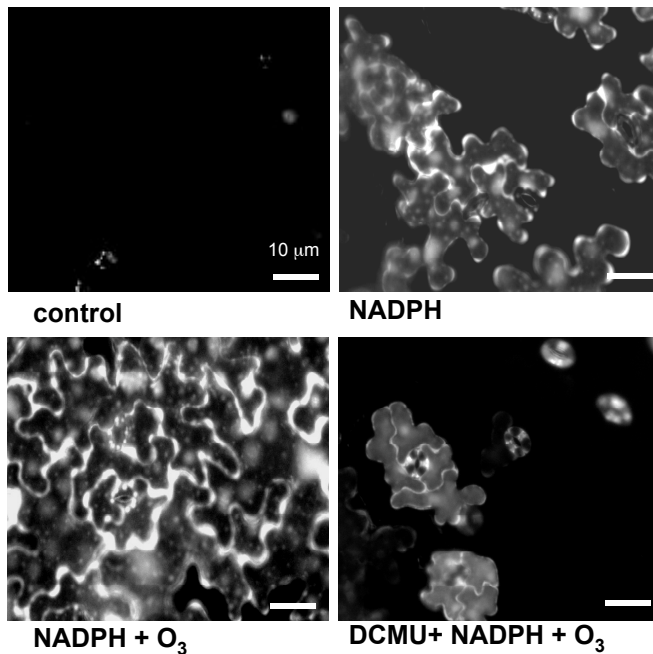

**Supplemental Figure 3. Effects of NADPH and DCMU on ozone induced-ROS.** Fluorescence microscopy imaging of ROS in epidermal tissue. Plants were pretreated with DCMU or NADPH for 2 hrs, then exposed 350 ppb ozone 0.5 hr as described in Methods. Epidermal peels were loaded with H<sub>2</sub>DCF-DA, washed, and examined by fluorescence microscopy.
