# Supplementary material
Source: PubMed Central journal article supplement (PMC1069711)
Supplement: plntcell_tpc.104.029603_4.pdf [file plntcell_tpc.104.029603_4.pdf]

**Different signaling and cell-death roles of heterotrimeric G protein  $\alpha$  and  $\beta$  subunits in the *Arabidopsis* oxidative stress response to ozone.**

Junghee H. Joo, Shiyu Wang, J. G. Chen, A. M. Jones and Nina V. Fedoroff  
Plant Cell 17:1-14 (2005)

**Supplemental Data**

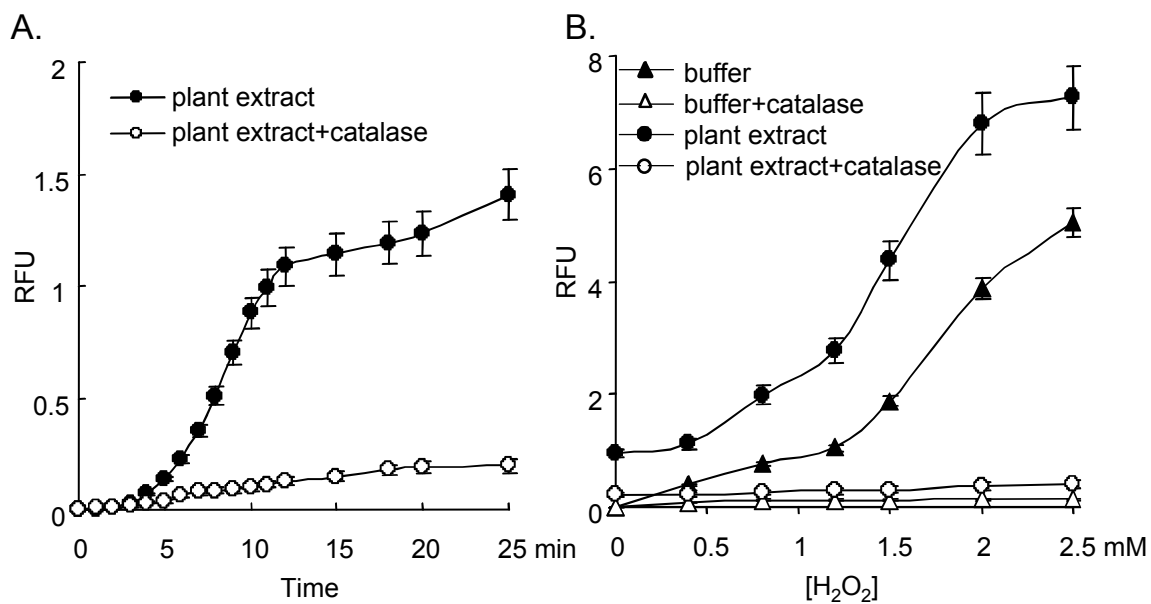

**Supplemental Figure 4. Reactive oxygen species (ROS) assays using 2', 7'-dichlorodihydro-fluorescein diacetate (H<sub>2</sub>-DCFDA).** A. Frozen plant tissue was ground in liquid nitrogen. The powder was weighed and immediately taken up in 10 mM Tris-HCl buffer, pH 7.3. The extract was centrifuged twice at 15,000 rpm for 5 min. ROS production was assayed by adding 100 mM H<sub>2</sub>-DCFDA in dimethyl sulfoxide (DMSO) to a final concentration of 10  $\mu$ M, incubating for the indicated time at room temperature, and measuring fluorescence using a VersaFluor fluorometer (Bio-Rad, Hercules, CA). Each measurement was carried out on two equal aliquots, to one of which catalase was added at a concentration of 300 U/ml. Total protein was quantified using a BioRad DC protein assay kit (Bio-Rad, Hercules, CA). The average fluorescence value obtained from 3 successive measurements was divided by the protein content and expressed as relative fluorescence units (RFU) per mg protein. B. H<sub>2</sub>O<sub>2</sub> was added to the indicated final concentration to each aliquot of plant extract prepared in 10 mM Tris-HCl buffer, pH 7.3, with or without added catalase. The ROS assay was carried out using H<sub>2</sub>-DCFDA as described in A.
