# Supplementary material
Source: PubMed Central journal article supplement (PMC1069711)
Supplement: plntcell_tpc.104.029603_6.pdf [file plntcell_tpc.104.029603_6.pdf]

**Different signaling and cell-death roles of heterotrimeric G protein  $\alpha$  and  $\beta$  subunits in the *Arabidopsis* oxidative stress response to ozone.**

Junghee H. Joo, Shiyu Wang, J. G. Chen, A. M. Jones and Nina V. Fedoroff  
Plant Cell 17:1-14 (2005)

**Supplemental Data**

**Supplemental Table 1. Conductivity measurements.** To measure tissue damage by ion leakage, 18 leaves from 2 plants were collected at the times indicated in each figure, rinsed with distilled water, then shaken in 25 ml distilled water on a rotary shaker at 100 rpm for 4 hrs at room temperature. The conductivity of the wash solution ( $\mu\text{S}/\text{cm}$ ) was determined using a Corning 316 conductivity meter (Corning Inc. Big Flats, NY). The total ion content was obtained by determining the conductivity of the same leaf-

| Figure containing data | Genotype or treatment | Air                                                    |                                                            | Ozone                                                  |                                                            |
|------------------------|-----------------------|--------------------------------------------------------|------------------------------------------------------------|--------------------------------------------------------|------------------------------------------------------------|
|                        |                       | Conductivity of wash sol'n ( $\mu\text{S}/\text{cm}$ ) | Conductivity after autoclaving ( $\mu\text{S}/\text{cm}$ ) | Conductivity of wash sol'n ( $\mu\text{S}/\text{cm}$ ) | Conductivity after autoclaving ( $\mu\text{S}/\text{cm}$ ) |
| Fig 1D                 | Col-O                 | 64.2                                                   | 676.5                                                      | 117.5                                                  | 668.3                                                      |
|                        | <i>agbl-2</i>         | 72.2                                                   | 610.7                                                      | 164.2                                                  | 604.9                                                      |
|                        | <i>gpal-4</i>         | 64.5                                                   | 611.3                                                      | 78.3                                                   | 673.2                                                      |
| Fig 3B-D               | Control/DCMU          | 39.1                                                   | 545.0                                                      | 82.8                                                   | 550.0                                                      |
|                        | DCMU                  | 44.1                                                   | 560.0                                                      | 48.3                                                   | 570.0                                                      |
|                        | Control /DPI          | 38.0                                                   | 580.0                                                      | 94.7                                                   | 589.0                                                      |
|                        | DPI                   | 47.1                                                   | 562.0                                                      | 49.6                                                   | 578.0                                                      |
|                        | Control/AA            | 41.0                                                   | 562.0                                                      | 108.1                                                  | 570.0                                                      |
|                        | AA                    | 60.3                                                   | 585.0                                                      | 68.2                                                   | 569.0                                                      |
| Fig 5C                 | Col-O                 | 59.0                                                   | 656.5                                                      | 141.7                                                  | 651.0                                                      |
|                        | <i>atrboh D</i>       | 58.9                                                   | 649.0                                                      | 133.8                                                  | 662.0                                                      |
|                        | <i>atrboh F</i>       | 45.6                                                   | 620.0                                                      | 94.6                                                   | 610.0                                                      |
|                        | <i>atrboh D/F</i>     | 32.2                                                   | 609.0                                                      | 76.6                                                   | 602.0                                                      |

| Fig 2D        | Air                                |                                        | Pretreatment                       |                                        | No pretreatment                    |                                        |
|---------------|------------------------------------|----------------------------------------|------------------------------------|----------------------------------------|------------------------------------|----------------------------------------|
|               | Conductivity of wash sol'n (μS/cm) | Conductivity after autoclaving (μS/cm) | Conductivity of wash sol'n (μS/cm) | Conductivity after autoclaving (μS/cm) | Conductivity of wash sol'n (μS/cm) | Conductivity after autoclaving (μS/cm) |
| Col-O         | 36.8                               | 399.0                                  | 39.6                               | 523.3                                  | 86.3                               | 480.0                                  |
| <i>agbl-2</i> | 21.8                               | 368.0                                  | 52.2                               | 413.3                                  | 101.4                              | 312.0                                  |
| <i>gpa1-4</i> | 33.3                               | 376.5                                  | 20.9                               | 444.0                                  | 32.3                               | 425.3                                  |
